# Supplementary material for: Surface-enhanced Raman spectroscopy detection of organic molecules and in situ monitoring of organic reactions by ion-induced silver nanoparticle clusters
Source: Royal Society of Chemistry journal article supplement (doi:10.1039/d1cp04857k), 2021-12-23
Supplement: d1cp04857k1.pdf [file d1cp04857k1.pdf]

## Supporting Information

# Surface-enhanced Raman spectroscopy Detection of Organic Molecules and *in situ* Monitoring of Organic Reactions by Ion-induced Silver Nanoparticle Clusters

*Xiaoyue Li, <sup>[a]</sup> Xiaotong Wang, <sup>[b]</sup> Jiaxin Liu, <sup>[b]</sup> Miaomiao Dai, <sup>[a]</sup> Qianjun Zhang, <sup>[a]</sup> and Yang Li\*<sup>[a], [b]</sup>, Jian-An Huang\*<sup>[c]</sup>*

<sup>a</sup> College of Chemistry and Chemical Engineering, Guizhou University, No. 2708, South Section of Huaxi Avenue, Guiyang City, Guizhou Province, China.

<sup>b</sup> College of Pharmacy, Harbin Medical University, No. 157, Health Road, Nangang District, Harbin City, Heilongjiang Province, China.

<sup>c</sup> Faculty of Medicine, Faculty of Biochemistry and Molecular Medicine, University of Oulu, 2125B, Aapistie 5A, 90220 Oulu, Finland

### Corresponding Author

\* Dr. Jian-An Huang.

E-mail: [Jianan.huang@oulu.fi](mailto:Jianan.huang@oulu.fi)

\* Dr. Yang Li.

Tel: 86-17678345698;

Fax: 86-851-83625867;

E-mail: [liy@hrbmu.edu.cn](mailto:liy@hrbmu.edu.cn)

## **TABLE OF CONTENT**

|                                                                     |              |
|---------------------------------------------------------------------|--------------|
| <b>S1. Experimental method.....</b>                                 | <b>S1</b>    |
| <b>S2. TEM spectra of Ag@IACNPs.....</b>                            | <b>S2</b>    |
| <b>S3. DLS spectra of Ag@IACNPs.....</b>                            | <b>S3</b>    |
| <b>S4. SERS spectra reproducibility.....</b>                        | <b>S4</b>    |
| <b>S5. Raman spectra of acetone using various substrate.....</b>    | <b>S5</b>    |
| <b>S6. SERS spectra of esterification reaction monitoring.....</b>  | <b>S6</b>    |
| <b>S7. The limit of detection (LOD) use AgIACNPs substrate.....</b> | <b>S7</b>    |
| <b>S8. Enhancement factor (EF) calculation.....</b>                 | <b>S8</b>    |
| <b>S9. The Raman peak assign to Organic molecules.....</b>          | <b>S9-10</b> |
| <b>S10. References.....</b>                                         | <b>S11</b>   |

## **S1. Experimental method**

### **Ag@ IACNPs preparation**

The Ag@IACNPs was prepared based on our previous work. Briefly, 5 mL of sodium citrate-reduced silver sol was centrifuged (5500 rpm, 10 min, 15 ° C), after the removal of the supernatant, 15  $\mu$ L of the centrifuged silver sol was mixed with 15  $\mu$ L of potassium iodide solution (1 mM) at room temperature for 30 minutes. Then, add 1  $\mu$ L of the mixture sample and 2  $\mu$ L of  $\text{Ca}^{2+}$  (0.01 M  $\text{CaCl}_2 \cdot 2\text{H}_2\text{O}$ ) one after another. The SERS test instrument is made by WITec alpha 300R. (Germany). The laser wavelength is 532 nm, the scan time is 30 s, and each test is accumulated once.

### **Sample preparation for SERS**

#### **Organic small molecule**

Organic samples (AR grade) were purchased from Chongqing Chuandong Chemical (Group) Co., Ltd. We dissolve 10  $\mu$ L of pure sample in the mixture of 30  $\mu$ L pure water and 100  $\mu$ L acetone, and then add 1  $\mu$ L mixture sample and 2  $\mu$ L of  $\text{Ca}^{2+}$  (0.01 M  $\text{CaCl}_2 \cdot 2\text{H}_2\text{O}$ ) one after another to AgIACNPs. After that, the mixture was shaken well for SERS detection. The aggregation of nanoparticles does not increase in a linear relationship.

#### **Monitoring organic reactions**

Organic samples (AR grade) were purchased from Chongqing Chuandong Chemical (Group) Co., Ltd. After the reaction started, 20  $\mu$ L reaction solution was added into 30  $\mu$ L pure water to quench the reaction. Shake the mixture well, and then, add 1  $\mu$ L of the mixture sample and 2  $\mu$ L of  $\text{Ca}^{2+}$  (0.01 M  $\text{CaCl}_2 \cdot 2\text{H}_2\text{O}$ ) one after another.

## S2. TEM images of Ag@IACNPs

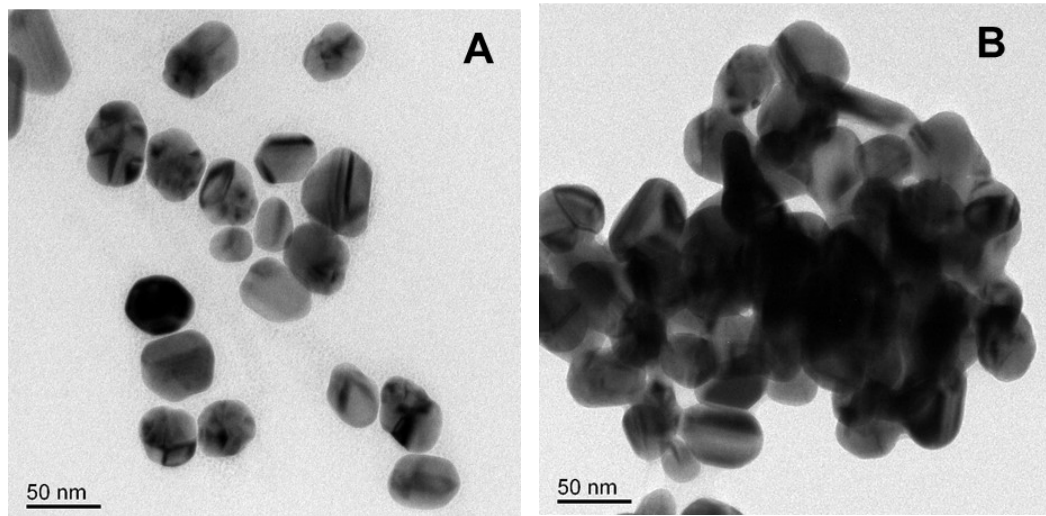

Figure S1. (A) Transmission electron microscopy (TEM) image of the nanoparticles (Ag@IA). (B) TEM image of nanoparticles after introducing  $\text{Ca}^{2+}$  ions in the above system (Ag@IACNPs).

### S3. DLS spectra of Ag@IACNPs

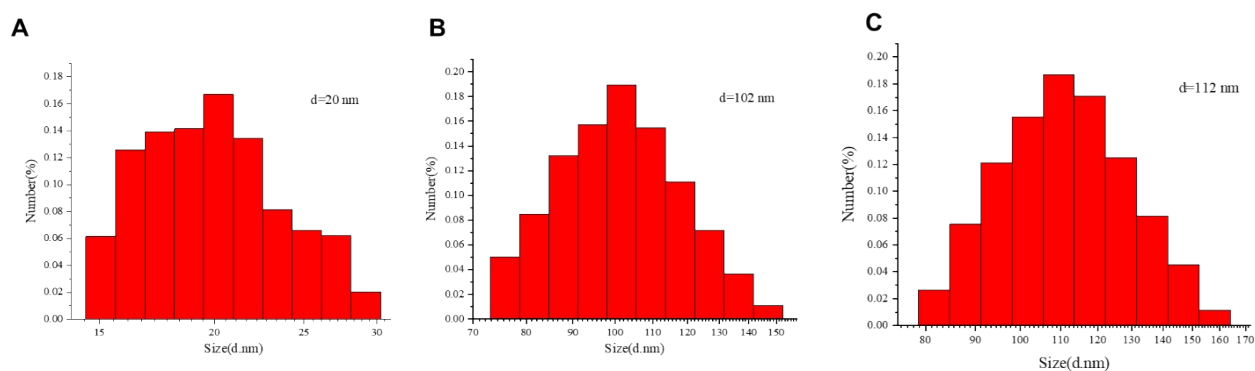

Figure S2. (A) DLS data of the nanoparticles after adding potassium iodide solution to replace citrate ions (Ag@I). (B) DLS data of the nanoparticles after adding  $\text{Ca}^{2+}$  ions to the Ag@I nanoparticles to induce aggregation. (C) DLS data of the nanoparticles after adding  $\text{Ca}^{2+}$  ions and organic molecules.

## S4. SERS spectra reproducibility

The relative standard deviation (RSD) of the predominant peaks of ethyl phenylpropiolate at 2208, 2236 and 1709 $\text{cm}^{-1}$  in Figure S3 below are calculated as follows:

$$RSD = \frac{StD}{\bar{x}} \times 100\%$$

where StD is the standard deviation and  $\bar{x}$  is the average value of the Raman peak intensities of the 15 spectra.

Table S1. RSD calculation of the SERS peaks of ethyl phenylpropiolate

| Raman peak ( $\text{cm}^{-1}$ ) | StD (counts) | $\bar{x}$ (counts) | RSD (%) |
|---------------------------------|--------------|--------------------|---------|
| 2208                            | 434.01157    | 4369.96921         | 9.93    |
| 2236                            | 356.17294    | 3006.80055         | 11.84   |
| 1709                            | 309.18691    | 2307.68787         | 13.39   |

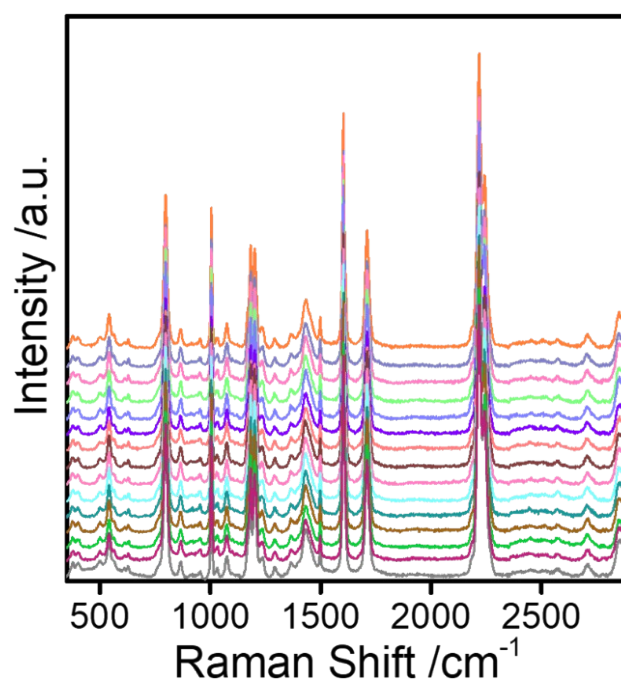

Figure S3. 15 sets of random SERS signals obtained by 5 mM ethyl phenylpropiolate in the presence of the enhanced substrate Ag@IACNPs.

## S5. Raman spectra of acetone using various substrate

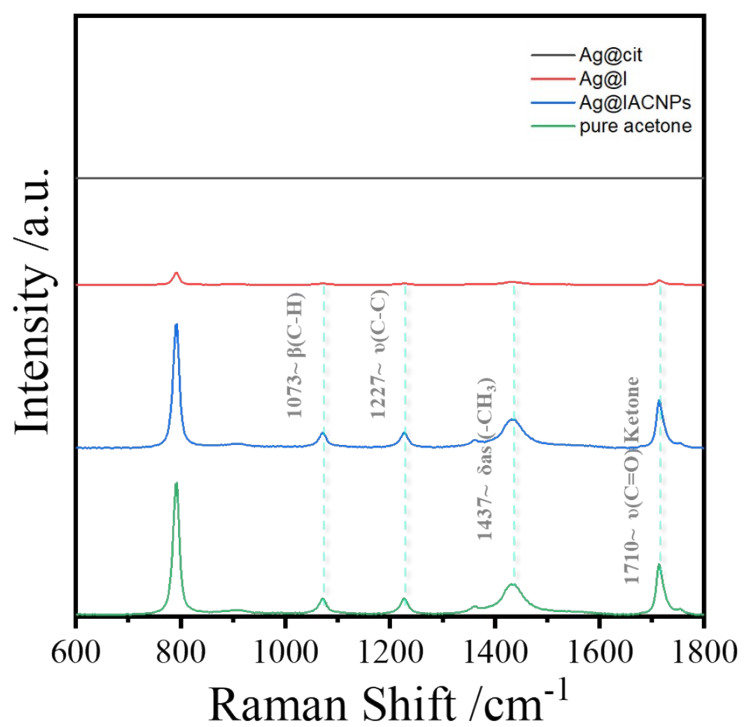

Figure S4. Raman spectra of acetone using substrate of Ag@IACNPs (blue line), Ag@I (red line), Ag@cit (black line) and Raman spectra of pure acetone (green line).

## S6. SERS spectra of esterification reaction monitoring

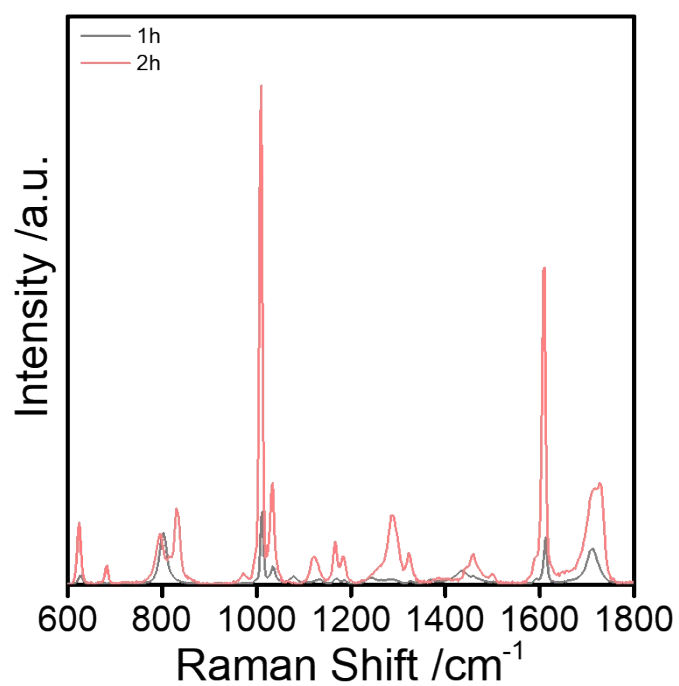

Figure S5. The SERS spectra of esterification reaction monitoring obtained by current method at different times.



## S7. The limit of detection use AgIACNPs substrate

Table S2. LOD calculation of the SERS peak of ethyl phenylpropiolate

| Raman peak ( $\text{cm}^{-1}$ ) | Y-intercept value | standard errors of the Y-intercept | LOD (mol/L)           |
|---------------------------------|-------------------|------------------------------------|-----------------------|
| 2208                            | 151.53946         | $\pm 128.7516$                     | $3.97 \times 10^{-5}$ |

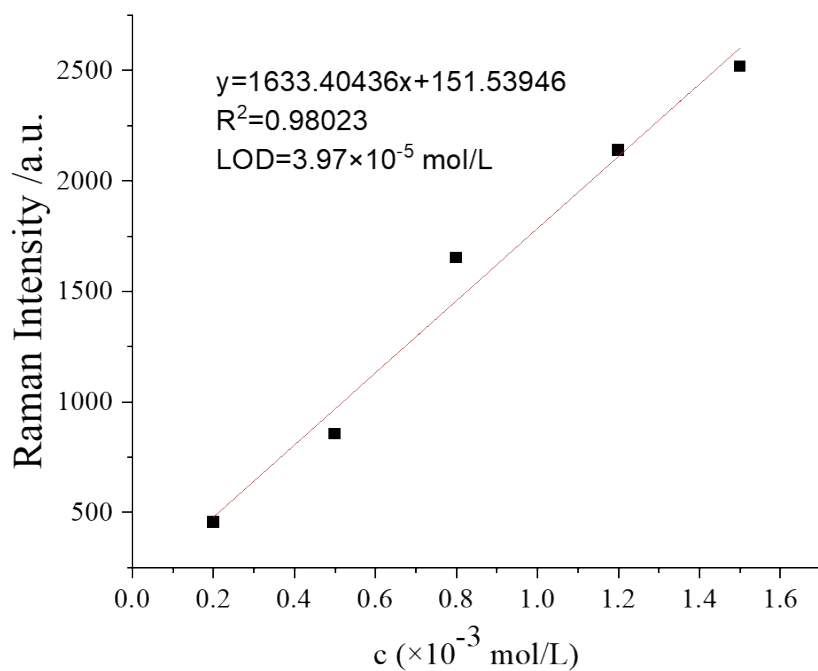

Figure S6. The calibration curve of the concentration of ethyl phenylpropiolate at  $2208\text{cm}^{-1}$  versus the Raman intensity.

## S8. Enhancement factor (EF) calculation

The EF is calculated by the following formula:

$$EF = \frac{I_{SERS}/(\mu_M \mu_S A_M)}{I_{RS}/(C_{RS} H_{eff})}$$

where  $I_{RS}$  is the Raman intensity of the analyte molecules under non-SERS conditions and  $I_{SERS}$  the intensity under SERS conditions.  $C_{RS}$  [ $\mu\text{m}^{-3}$ ] is the volume density of the molecules used for the non-SERS measurement,  $H_{eff}$  [ $\mu\text{m}$ ] is the effective height of the scattering volume of the objective,  $\mu_M$  [ $\mu\text{m}^{-2}$ ] is the surface density of the individual Ag@IACNPs producing the enhancement, and  $\mu_S$  [ $\mu\text{m}^{-2}$ ] is the surface density of molecules on the metal.  $A_M$  [ $\mu\text{m}^2$ ] is the surface area of one Ag@IACNPs. Because we are testing in a capillary tube, the cross-sectional area and volume of the test are the same. The simplified formula can be obtained:  $EF = (I_{SERS}/\mu_M)/(I_{RS}/C_{RS})$ .

$$EF_{2208} = (39325.727/3.05 \times 10^{-7}) / (8.1499/6.0563 \times 10^{-5}) = 9.58 \times 10^5$$

## S9. The Raman peak assign to Organic molecules

**Table S3.** The bands and their assignment appeared in the SERS spectra of Organic molecules

| Molecular name           | Raman Shift/cm <sup>-1</sup> | Assignment                                                    | Ref.  |
|--------------------------|------------------------------|---------------------------------------------------------------|-------|
| Acetone                  | 1710~                        | $\nu(\text{C}=\text{O})$ Ketone                               | [2,3] |
|                          | 1437~                        | $\delta_{\text{as}}(-\text{CH}_3)$                            |       |
|                          | 1227~                        | $\nu(\text{C}-\text{C})$                                      |       |
|                          | 1073~                        | $\beta(\text{C}-\text{H})$                                    |       |
| Cyclohexane              | 1350~, 1450~                 | $\delta(-\text{CH}_2)$ Cyclane<br>$\nu(-\text{CH}_2)$ Cyclane |       |
|                          | 1007~                        | $\delta(\text{ring})$                                         |       |
| Ethanol                  | 1457~                        | $\delta_{\text{as}}(-\text{CH}_3)$                            | [2,3] |
|                          | 1280~                        | $\beta(\text{O}-\text{H})$                                    |       |
|                          | 1101~, 1056~                 | $\nu(\text{C}-\text{O})$                                      |       |
|                          | 887~                         | $\gamma(\text{H}-\text{O})$                                   |       |
| Toluene                  | 1600~                        | $\delta(\text{ring})$                                         | [1]   |
|                          | 1371~                        | $\delta(-\text{CH}_3)$                                        |       |
|                          | 1215~, 1030~, 1003~          | $\beta(\text{C}-\text{H})$                                    |       |
|                          | 798~                         | $\beta(\text{C}-\text{H})$ Benzene<br>ring monosubstitution   |       |
| Benzaldehyde             | 2742~                        | $\nu(\text{C}-\text{H})$ Aldehyde hydrogen                    |       |
|                          | 1602~                        | $\delta(\text{ring})$                                         |       |
|                          | 1145~, 1029~, 1003~          | $\beta(\text{C}-\text{H})$                                    |       |
|                          | 847~                         | $\gamma(\text{C}-\text{H})$ benzene<br>ring monosubstitution  |       |
| Acetic Acid              | 650~                         | $\gamma_{\text{ring}}(\text{C}-\text{H})$                     |       |
|                          | 1692~                        | $\nu(\text{C}=\text{O})$ Carboxylic acid                      |       |
|                          | 1486~                        | $\beta(\text{O}-\text{H})$                                    |       |
|                          | 941~                         | $\omega(\text{C}-\text{H})$<br>$\omega(\text{O}-\text{H})$    |       |
| Ethyl phenylpropargylate | 2236~, 2208~                 | $\nu(\text{C}\equiv\text{C})$                                 |       |
|                          | 1709~                        | $\nu(\text{C}=\text{O})$ Esters                               |       |
|                          | 1616~, 1497~, 1450~          | $\delta_{\text{bk}}(\text{ring})$                             |       |
|                          | 1201~, 1181~                 | $\nu(\text{C}-\text{O}-\text{C})$                             |       |
|                          | 1029~, 1006~                 | $\delta(\text{C}-\text{H})$                                   |       |
|                          | 761~                         | $\gamma(\text{C}-\text{H})$ Benzene<br>ring monosubstitution  |       |
| Triazole                 | 1726~                        | $\nu(\text{C}=\text{O})$                                      |       |
|                          | 1532~                        | $\nu(\text{N}=\text{N})$                                      |       |
|                          | 1587~, 1477~, 1455~          | $\delta(\text{ring})$ Vibration<br>of benzene ring skeleton   |       |
|                          | 1269~, 1176~                 | $\nu(\text{C}-\text{O}-\text{C})$                             |       |

|                 |                     |                                                 |     |
|-----------------|---------------------|-------------------------------------------------|-----|
|                 | 1003~               | $\delta$ (C-H)                                  |     |
|                 | 841~                | $\gamma$ (C-H) Benzene<br>ring monosubstitution |     |
| Methyl benzoate | 1723~, 1681~        | $\nu$ (C=O) Esters<br>and ketones               |     |
|                 | 1603~, 1501~, 1445~ | $\delta$ (ring)                                 |     |
|                 | 1131~, 1109~, 1011~ | $\beta$ (C-H)                                   |     |
|                 | 847~                | $\gamma$ (C-H) Benzene<br>ring monosubstitution |     |
|                 | 721~, 685~          | $\gamma_{\text{ring}}$ (C-H)                    |     |
| Methanol        | 1463~               | $\delta_{\text{as}}$ (-CH <sub>3</sub> )        |     |
|                 | 1372~               | $\beta$ (O-H)                                   |     |
|                 | 1026~               | $\nu$ (C-O)                                     | [4] |
|                 | 843~                | $\gamma$ (H-O)                                  |     |

---

Note:  $\nu$  = stretch,  $\delta$  = deformation,  $\beta$  = in-plane bending vibration,  $\gamma$  = external bending vibration,  $\omega$  = out of plane sway vibration, bk = backbone.

## S10. References

1. Q. Q. Chen, R. N. Hou, Y. Z. Zhu, X. T. Wang, H. Zhang, Y. J. Zhang, L. Zhang, Z.Q. Tian, and J. F. Li, *Anal. Chem.*, 2021, **93**, 7188–7195.
2. C. L. Wong, U.S. Dinish, M. S. Schmidt, M. Olivo, *Anal. Chim. Acta*, 2014, **844**, 54-60.
3. J. H. Fu, Z. Zhong, D. Xie, Y. J. Guo, D. X. Kong, Z. X. Zhao, Z. X. Zhao, M. Li, *Angew. Chem.*, 2020, **59**, 20489-20498.
4. X. Chen, M. M. Liang, J. Xu, H. L. Sun, C. Wang, J. Wei, H. Zhang, W. M. Yang, Z. L. Yang and J. J. Sun, *Nanoscale*, 2020, **12**, 5341-5346.
